# Supplementary material for: Cold-Induced Thermogenesis Depends on ATGL-Mediated Lipolysis in Cardiac Muscle, but Not Brown Adipose Tissue
Source: PubMed Central journal article supplement — Cell Metab. 2017 Nov 7;26(5):753–763.e7. doi: 10.1016/j.cmet.2017.09.004 (PMC5683855; doi:10.1016/j.cmet.2017.09.004), 2017-11-07
Supplement: mmc1.pdf [file mmc1.pdf]

**Cell Metabolism, Volume 26**

**Supplemental Information**

**Cold-Induced Thermogenesis Depends  
on ATGL-Mediated Lipolysis in Cardiac  
Muscle, but Not Brown Adipose Tissue**

**Renate Schreiber, Clemens Diwoky, Gabriele Schoiswohl, Ursula Feiler, Nuttaporn Wongsiriroj, Mahmoud Abdellatif, Dagmar Kolb, Joris Hoeks, Erin E. Kershaw, Simon Sedej, Patrick Schrauwen, Guenter Haemmerle, and Rudolf Zechner**

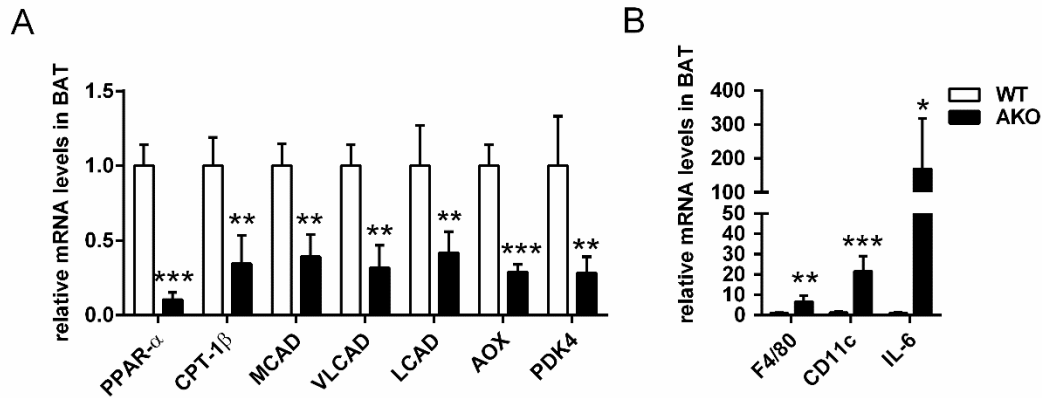

Figure S1. Related to Figure 1

**Figure S1. Global ATGL deficiency causes cold-induced hypothermia and BAT hypertrophy, but does not alter mitochondrial function in BAT. Related to Figure 1.**

- (A) Relative mRNA expression of PPAR- $\alpha$  and its target genes in BAT ( $n = 5$ ).
- (B) Relative mRNA expression of inflammation markers in BAT ( $n = 5$ ).

Gene expression analyses were performed in BAT from male mice aged 9–10 weeks upon cold exposure at 5°C for 3–6 hr. Data are presented as means  $\pm$  SD. Statistical significance was evaluated by unpaired, two-tailed Student's *t* test. \*,  $p < 0.05$ , \*\*,  $p < 0.01$ , and \*\*\*,  $p < 0.001$ .

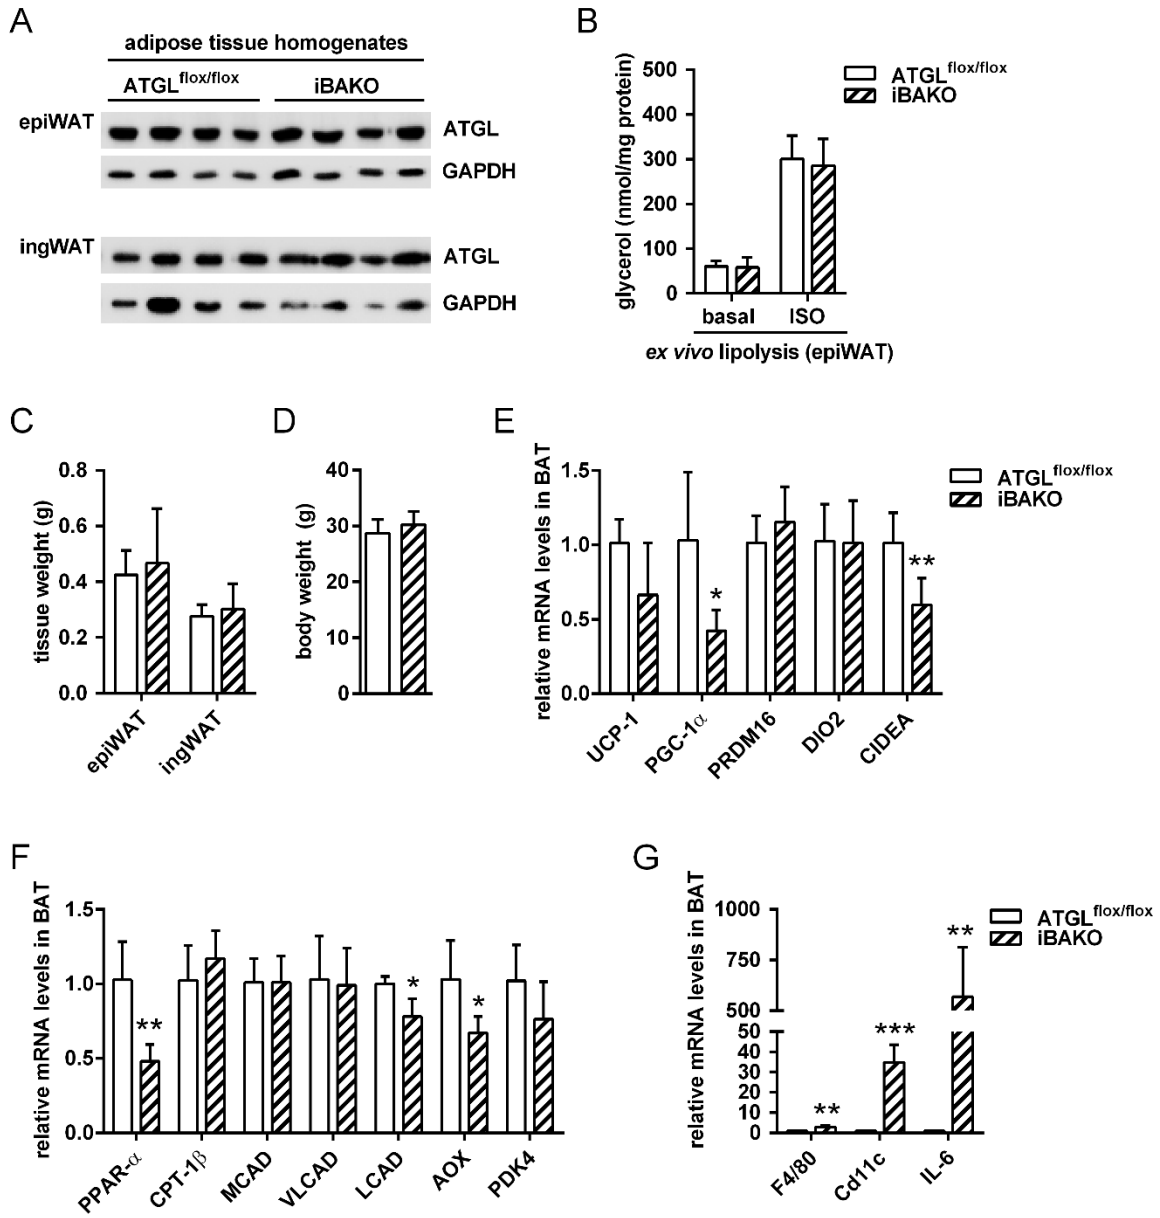

Figure S2. Related to Figure 2

**Figure S2. ATGL in BAT is not essential for thermogenesis during acute cold. Related to Figure 2.**

- (A) ATGL immunoblot of epiWAT and ingWAT homogenates.
- (B) *Ex vivo* lipolysis from epiWAT under basal and isoproterenol (ISO)-stimulated conditions ( $n = 4$ ).
- (C) Tissue weights ( $n = 6$ ).
- (D) Body weight ( $n = 11$ ).
- (E) Relative mRNA expression of BAT-specific genes in BAT ( $n = 5$ ).
- (F) Relative mRNA expression of PPAR- $\alpha$  and its target genes in BAT ( $n = 5$ ).
- (G) Relative mRNA expression of inflammation markers in BAT ( $n = 5$ ).

Analyses were performed in male mice aged 9–11 weeks and 4-weeks upon tamoxifen administration. Protein expression and *ex vivo* lipolysis were performed in tissues derived from mice housed at normal housing temperatures at 22°C–23°C. Gene expression analyses were performed in BAT from mice exposed to cold at 5°C for 6 hr. Data are presented as means  $\pm$  SD. Statistical significance was evaluated by unpaired, two-tailed Student's t test or two-way ANOVA with Bonferroni post-hoc tests. \*,  $p < 0.05$ , \*\*,  $p < 0.01$ , and \*\*\*,  $p < 0.001$ .

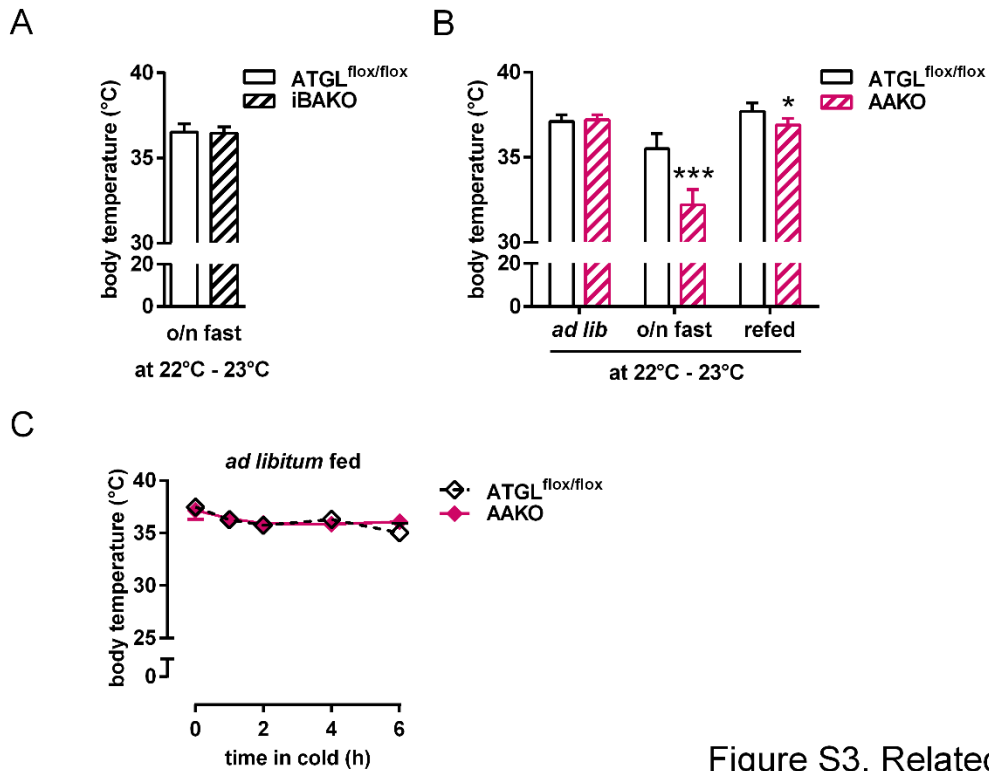

Figure S3. Related to Figure 3

**Figure S3. ATGL-mediated lipolysis in WAT is essential to fuel thermogenesis during fasting. Related to Figure 3.**

- (A) Body temperature of mice of mixed sex aged 10–12 weeks and 4-weeks upon tamoxifen administration after an overnight (o/n) fast for 12 hr at 22°C–23°C ( $n = 5–6$ ).
- (B) Body temperature of male mice aged 10–12 weeks in the *ad libitum* fed (*ad lib*), o/n fasted for 12 hr, and refeeding state for 1 hr at 22°C–23°C ( $n = 6–7$ ).
- (C) Body temperature of male mice aged 16 weeks in the *ad libitum* fed state during acute cold exposure at 5°C ( $n = 5$ ).

Data are presented as means  $\pm$  SD. Statistical significance was evaluated by unpaired, two-tailed Student's t test. \*,  $p < 0.05$  and \*\*\*,  $p < 0.001$ .

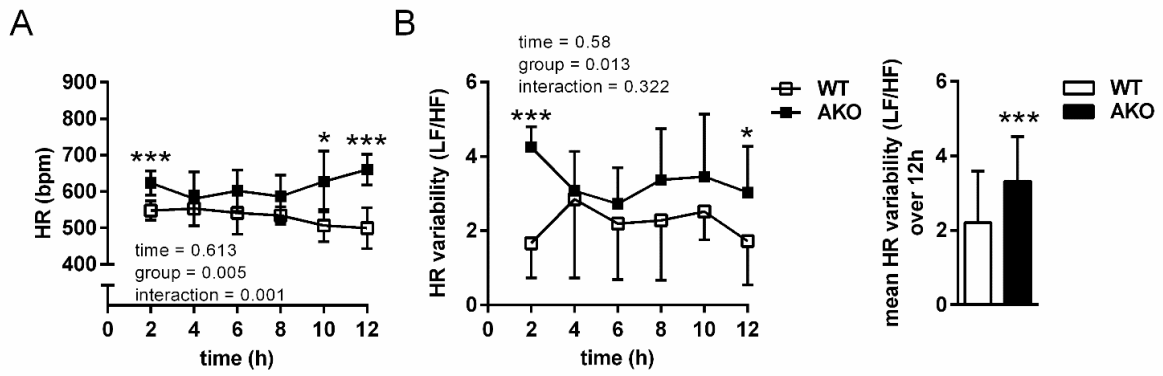

baseline at 22°C - 23°C

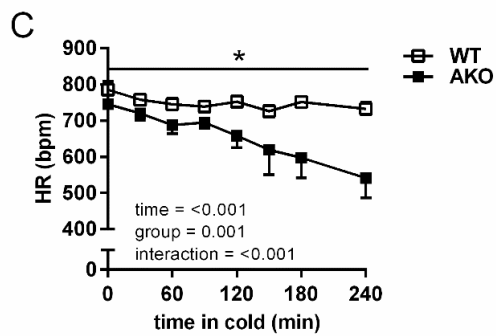

cold at 5°C

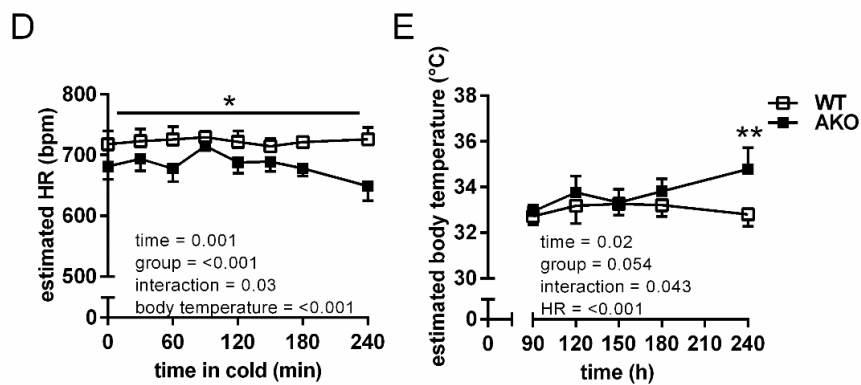

ANCOVA analyses, cold at 5°C

Figure S4. Related to Figure 4

**Figure S4. Impaired heart function due to cardiac ATGL deficiency causes hypothermia. Related to Figure 4.**

- (A) Heart rate (HR) under baseline at normal housing temperatures at 22°C–23°C ( $n = 6$ ).
- (B) HR variability (ratio of low-to-high frequency, LF/HF) during normal housing temperatures at 22°C–23°C. Time-course (left) and mean over the whole analyses period of 12 hr (right,  $n = 6$ ).
- (C) HR upon acute cold exposure at 5°C ( $n = 4$ ).
- (D) Estimated HR at a hypothetical body temperature of 34°C ( $n = 4$ ).
- (E) Estimated body temperature for corrected HR of 689 bpm ( $n = 4$ ).

HR analyses were performed using telemetry transmitters in male mice aged 8 weeks. Data are presented as means  $\pm$  SD. Statistical significance was evaluated by two-way ANOVA (A – C) or unpaired, two-tailed Student's *t* test (B, right graph). ANCOVA was used to analyze estimated HR and body temperature (D – E). \*,  $p < 0.05$ , \*\*,  $p < 0.01$  and \*\*\*,  $p < 0.001$ .

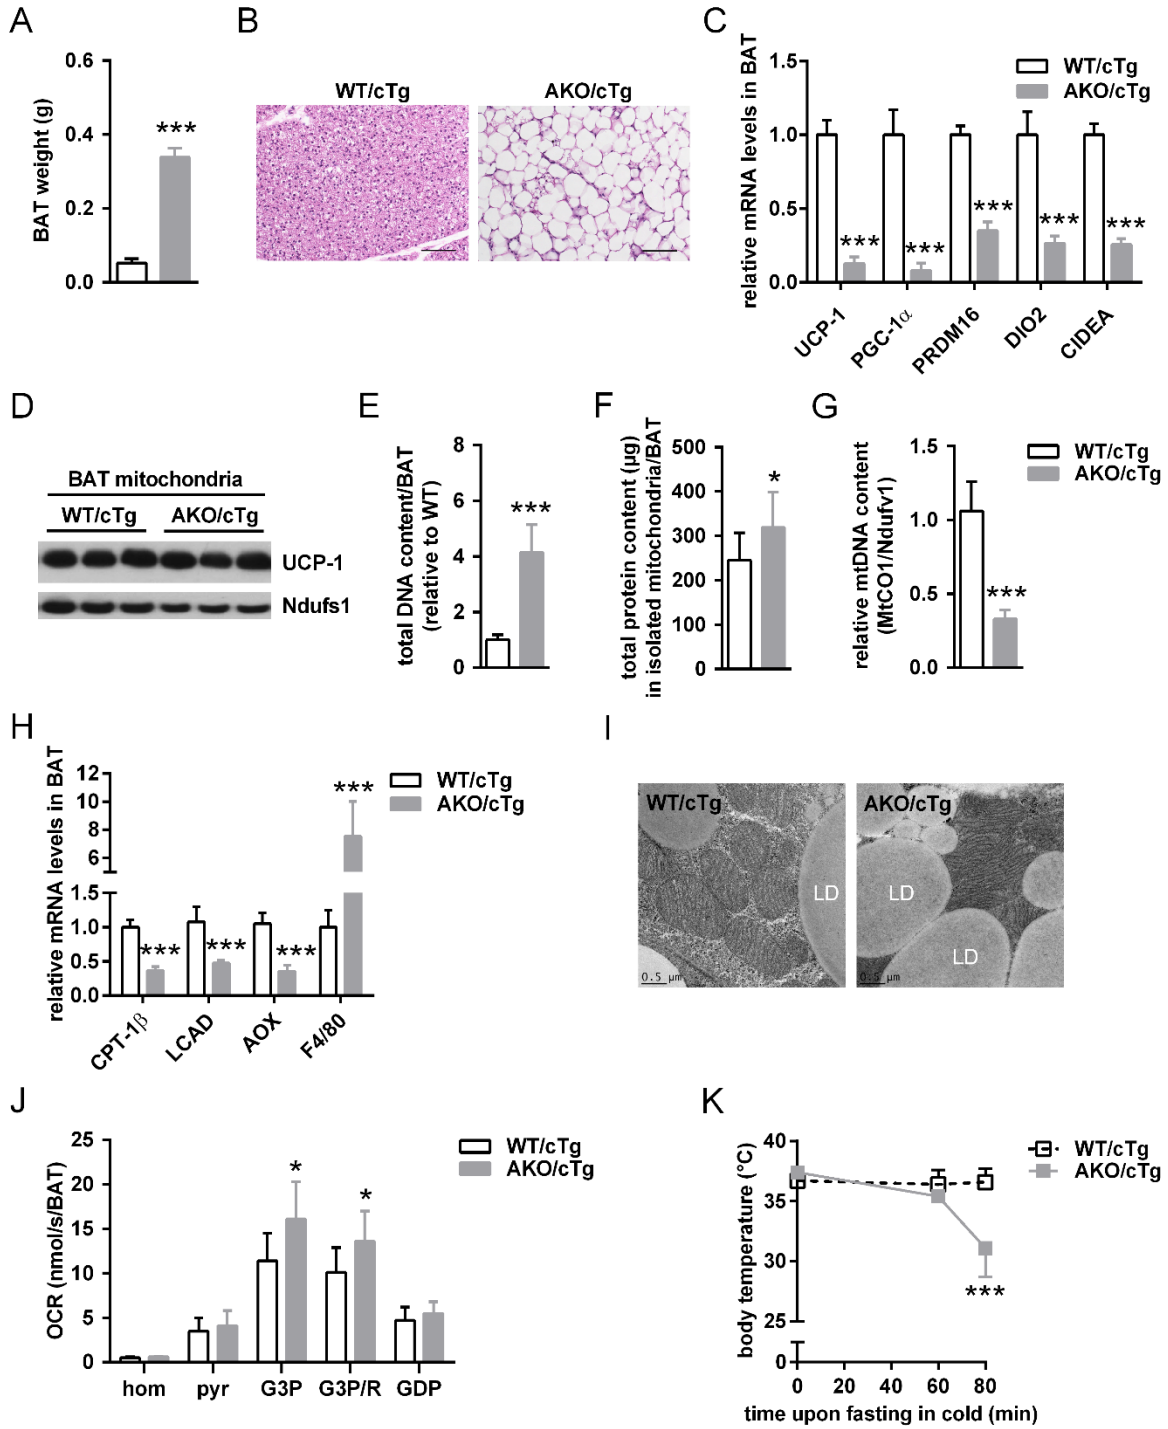

Figure S5 - Related to Figure 4



**Figure S5. Impaired heart function due to cardiac ATGL deficiency causes hypothermia. Related to Figure 4.**

- (A) BAT weight ( $n \geq 5$ ).
- (B) Histology of BAT. Scale bar, 100  $\mu\text{m}$ .
- (C) Relative mRNA expression of classical brown fat genes upon acute cold exposure ( $n = 6$ ).
- (D) UCP-1 immunoblot of isolated BAT mitochondria upon acute cold exposure.
- (E) Total DNA content in whole BAT depots ( $n = 6$ ).
- (F) Total protein content in isolated mitochondria from whole BAT depots ( $n = 10$ ).
- (G) Relative mitochondrial (mt) DNA content in BAT assessed by qPCR and calculated from copy number of the mtDNA encoded MtCO1 gene and the nuclear DNA encoded Ndufv1 gene ( $n = 6$ ).
- (H) Relative mRNA expression of PPAR- $\alpha$  targets and inflammation marker upon acute cold exposure ( $n = 6$ ).
- (I) Representative transmission electron micrographs from BAT. Scale bar, 0.5  $\mu\text{m}$ .
- (J) Oxygen consumption rates (OCR) in BAT homogenates (hom) using pyruvate (pyr), glycerol-3-P in the absence (G3P) and presence of rotenone (G3P/R), and guanosine 5'-diphosphate (GDP). OCR were calculated for whole BAT depots ( $n = 8-9$ ).
- (K) Body temperature during fasting at 5°C for indicated time points ( $n = 5-6$ ).

Male mice aged 8–12 weeks were used, except for (J) using mice of mixed sex and (K) using female mice aged 12–16 weeks. Data are presented as means  $\pm$  SD. Statistical significance was evaluated by unpaired, two-tailed Student's t test. \*,  $p < 0.05$ , \*\*,  $p < 0.01$  and \*\*\*,  $p < 0.001$ .

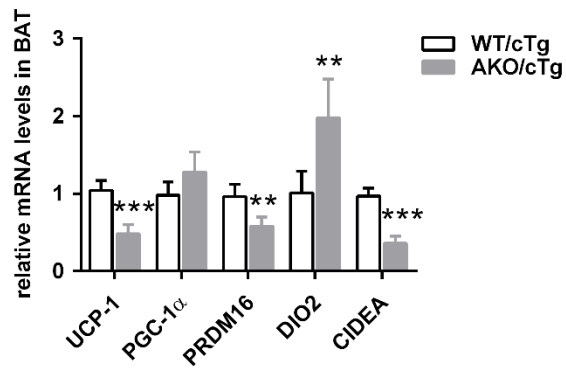

Figure S6. Related to Figure 5

**Figure S6. ATGL-deficient mice survive upon cold acclimation and exhibit normal brown adipocyte recruitment. Related to Figure 5.**

Relative mRNA expression in BAT from AKO/cTg mice upon cold acclimation at 5°C for 3 weeks ( $n = 5$ ).

Analyses were performed from *ad libitum* fed male AKO/cTg mice aged 10–12 weeks. Data are presented as means  $\pm$  SD. Statistical significance was evaluated by unpaired, two-tailed Student's t test. \*,  $p < 0.05$ , \*\*,  $p < 0.01$ , and \*\*\*,  $p < 0.001$ .

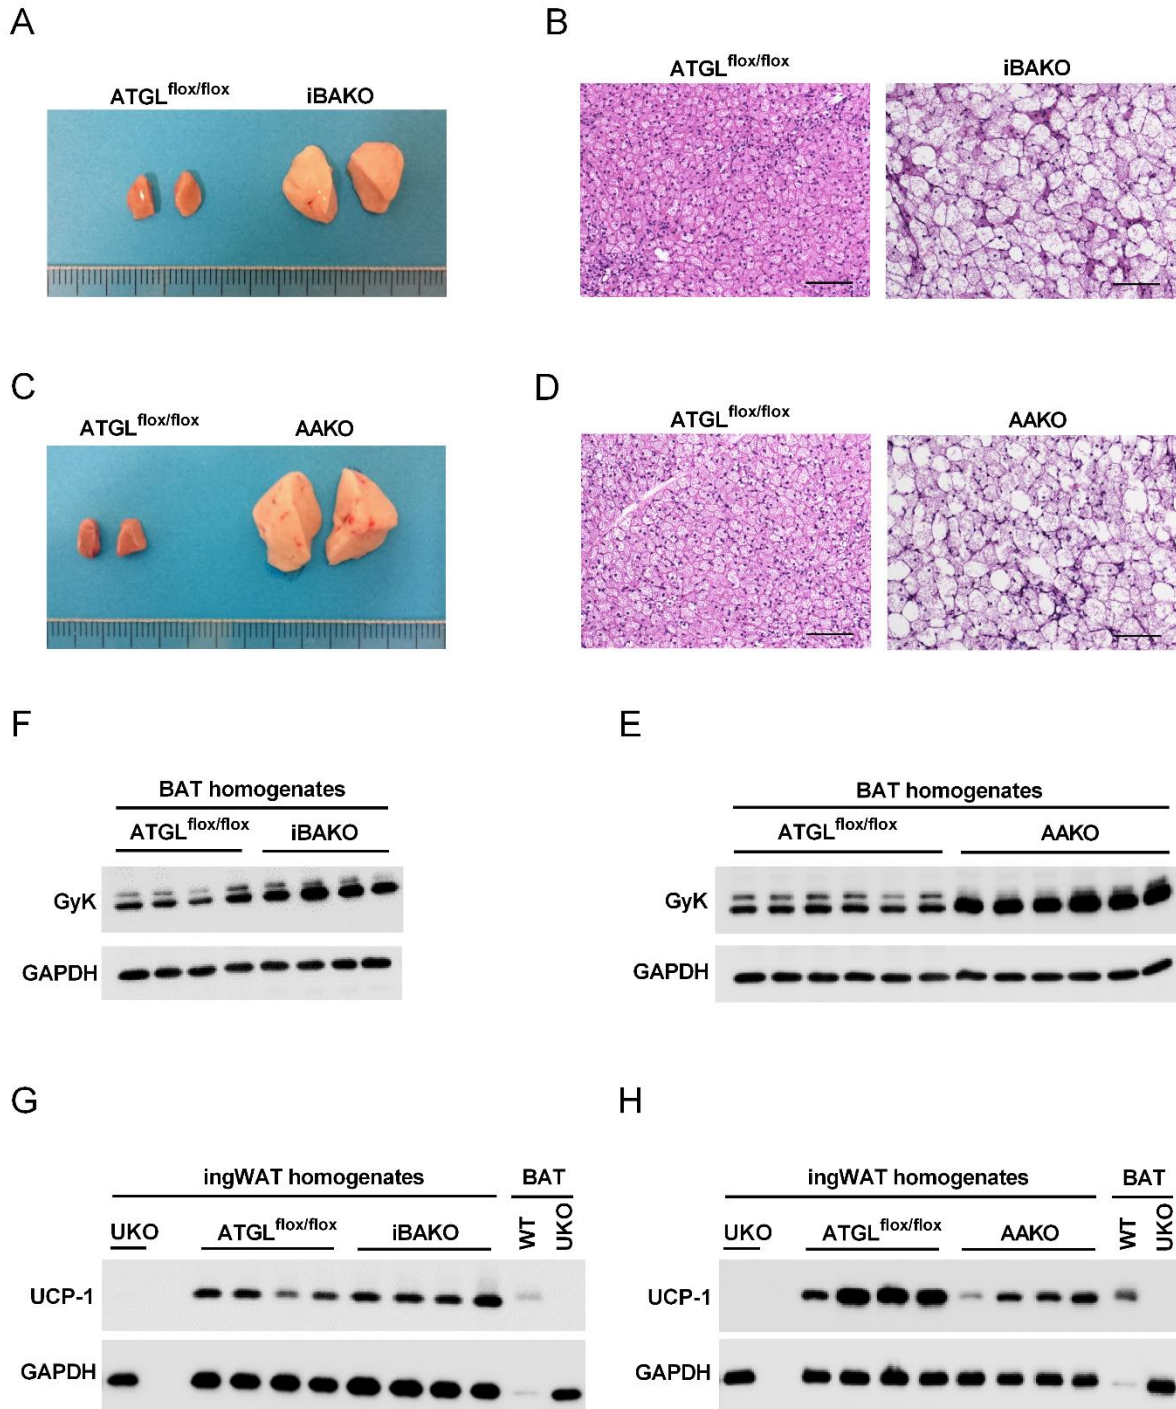

Figure S7. Related to Figure 6

**Figure S7. Adaptive NST is intact in ATGL-deficient BAT. Related to Figure 6.**

- (A, C) Gross morphology of BAT from iBAKO (A) and AAKO mice (C).
- (B, D) Representative histology image of BAT from iBAKO (B) and AAKO mice (D). Scale bar, 100  $\mu$ m.
- (F, E) Glycerol Kinase (GyK) immunoblot from BAT homogenates derived from iBAKO (F) and AAKO mice (E).
- (G, H) UCP-1 immunoblot of ingWAT homogenates from iBAKO (G) and AAKO mice (H). For all ingWAT samples, 20  $\mu$ g protein were loaded per lane. BAT derived from cold-acclimatized WT (5  $\mu$ g protein per lane) and UCP-1 knockout mice (UKO; 20  $\mu$ g protein per lane) were used as positive and negative controls, respectively.

All mice were acclimatized to cold at 5°C for 3 weeks. Tissues and tissue homogenates were derived from male mice aged 12–16 weeks and 4-weeks upon tamoxifen administration (iBAKO).

**Table S1. Plasma parameters of mutant mice upon acute cold exposure. Related to Figure 4.** Data are shown from male iHAKO at indicated periods of time upon tamoxifen administration (postTAM) ( $n = 5-9$ ). Plasma parameters were determined from *ad libitum* fed mice upon acute cold exposure at 5°C. Data are presented as means  $\pm$  SD. Statistical significance was evaluated by unpaired, two-tailed Student's t test. \*,  $p < 0.05$  and \*\*,  $p < 0.01$ .

| postTAM  | plasma levels   | genotype                  |                   |
|----------|-----------------|---------------------------|-------------------|
|          |                 | ATGL <sup>flox/flox</sup> | iHAKO             |
| 6-weeks  | glucose (mg/dl) | 205 $\pm$ 15              | 219 $\pm$ 27      |
|          | FA (mM)         | 0.35 $\pm$ 0.08           | 0.30 $\pm$ 0.10   |
|          | TG (mM)         | 0.29 $\pm$ 0.06           | 0.30 $\pm$ 0.12   |
| 10-weeks | glucose (mg/dl) | 204 $\pm$ 19              | 248 $\pm$ 30*     |
|          | FA (mM)         | 0.39 $\pm$ 0.11           | 1.02 $\pm$ 0.20** |
|          | TG (mM)         | 0.26 $\pm$ 0.15           | 0.68 $\pm$ 0.13** |

**Table S2. Body weight, body composition, plasma parameters, and food intake of mutant mice upon cold acclimation. Related to Figure 6.** Data are shown from male AKO/cTg mice aged of 10–12 weeks ( $n = 5-6$ ), male iBAKO mice aged 12–15 weeks and 5-weeks upon tamoxifen administration ( $n = 5-11$ ), and male AAKO mice aged 12 weeks ( $n = 6$ ). All mice were acclimatized to cold at 5°C for 3 weeks. Plasma parameters were determined from mice fed *ad libitum*. Data are presented as means  $\pm$  SD. Statistical significance was evaluated by unpaired, two-tailed Student's t test. \*,  $p < 0.05$ , \*\*\*,  $p < 0.001$ .

| analyzed parameter                             | genotypes                       |                  |
|------------------------------------------------|---------------------------------|------------------|
| <b>body composition</b>                        | <b>WT/cTg</b>                   | <b>AKO/cTg</b>   |
| body weight, g                                 | 23.1 $\pm$ 0.8                  | 24.6 $\pm$ 1.5   |
| iBAT mass, mg                                  | 112 $\pm$ 13                    | 622 $\pm$ 32***  |
| epiWAT mass, mg                                | 208 $\pm$ 22                    | 416 $\pm$ 55***  |
| ingWAT mass, mg                                | 180 $\pm$ 18                    | 614 $\pm$ 65***  |
| heart, mg                                      | 148 $\pm$ 12                    | 150 $\pm$ 19     |
| quadriceps, mg                                 | 327 $\pm$ 36                    | 302 $\pm$ 34     |
| <b>energy substrate levels and food intake</b> |                                 |                  |
| plasma glucose (mg/dl)                         | 192 $\pm$ 210                   | 194 $\pm$ 27     |
| plasma FA (mM)                                 | 0.60 $\pm$ 0.12                 | 0.28 $\pm$ 0.04* |
| plasma TG (mM)                                 | 0.50 $\pm$ 0.05                 | 0.50 $\pm$ 0.08  |
| food intake (g), light                         | 1.1 $\pm$ 0.3                   | 2.0 $\pm$ 0.5*   |
| food intake (g), dark                          | 6.1 $\pm$ 0.2                   | 5.6 $\pm$ 0.2*   |
| <b>body composition</b>                        | <b>ATGL<sup>flox/flox</sup></b> | <b>iBAKO</b>     |
| body weight, g                                 | 28.9 $\pm$ 1.3                  | 29.0 $\pm$ 1.4   |
| iBAT mass, mg                                  | 109 $\pm$ 11                    | 479 $\pm$ 26***  |
| epiWAT mass, mg                                | 285 $\pm$ 67                    | 171 $\pm$ 25*    |
| ingWAT mass, mg                                | 240 $\pm$ 34                    | 301 $\pm$ 56     |
| heart, mg                                      | 165 $\pm$ 2                     | 172 $\pm$ 15     |
| quadriceps, mg                                 | 339 $\pm$ 66                    | 321 $\pm$ 19     |
| <b>energy substrate levels and food intake</b> |                                 |                  |
| plasma glucose (mg/dl)                         | 193 $\pm$ 26                    | 174 $\pm$ 21     |
| plasma FA (mM)                                 | 0.39 $\pm$ 0.12                 | 0.45 $\pm$ 0.19  |
| plasma TG (mM)                                 | 0.51 $\pm$ 0.21                 | 0.66 $\pm$ 0.27  |
| food intake (g), light                         | 1.3 $\pm$ 0.4                   | 1.4 $\pm$ 0.4    |
| food intake (g), dark                          | 6.8 $\pm$ 0.9                   | 7.6 $\pm$ 1.2    |
| <b>body composition</b>                        | <b>ATGL<sup>flox/flox</sup></b> | <b>AAKO</b>      |
| body weight, g                                 | 27.2 $\pm$ 1.1                  | 29.3 $\pm$ 1.4*  |
| iBAT mass, mg                                  | 99 $\pm$ 11                     | 840 $\pm$ 132*** |
| epiWAT mass, mg                                | 214 $\pm$ 30                    | 440 $\pm$ 120**  |
| ingWAT mass, mg                                | 193 $\pm$ 34                    | 655 $\pm$ 93***  |
| heart, mg                                      | 164 $\pm$ 19                    | 163 $\pm$ 15     |
| quadriceps, mg                                 | 339 $\pm$ 14                    | 282 $\pm$ 34**   |
| <b>energy substrate levels and food intake</b> |                                 |                  |
| plasma glucose (mg/dl)                         | 204 $\pm$ 25                    | 172 $\pm$ 19*    |
| plasma FA (mM)                                 | 0.35 $\pm$ 0.12                 | 0.26 $\pm$ 0.05* |
| plasma TG (mM)                                 | 0.48 $\pm$ 0.26                 | 0.38 $\pm$ 0.17  |
| food intake (g), light                         | 1.3 $\pm$ 0.3                   | 2.3 $\pm$ 0.2*** |
| food intake (g), dark                          | 6.0 $\pm$ 0.3                   | 5.4 $\pm$ 0.3*   |

**Table S3. Primers used for relative gene expression and mtDNA content. Related to STAR methods.**

| Synonym        | Gene                                             | Primer sequences, fwd/rev                                      |
|----------------|--------------------------------------------------|----------------------------------------------------------------|
| UCP-1          | Uncoupling protein-1                             | 5'-ACTGCCACACCTCCAGTCATT-3'<br>5'-CTTTGCCTCACTCAGGATTGG-3'     |
| PGC-1 $\alpha$ | PPAR-g co-activator 1a                           | 5'-CAGCACGGTGAAGCCATT-3'<br>5'-TGCTGCTGTTCTGTTTTC-3'           |
| PRDM16         | PR domain containing 16                          | 5'-CAGCACGGTGAAGCCATT-3'<br>5'-GCGTGCATCCGCTTGTG-3'            |
| DIO2           | Type II deiodinase                               | 5'-CAGTGTGGTGCACGTCTCCAATC-3'<br>5'-TGAACCAAAGTTGACCACCAG-3'   |
| CIDEA          | Cell death-inducing DFFA-like effector A         | 5'-TGCTCTTCTGTATCGCCCAGT-3'<br>5'-GCCGTGTTAAGGAATCTGCTG-3'     |
| PPAR- $\alpha$ | Peroxisome proliferator activated receptor alpha | 5'-GTACCACTACGGAGTTCACGCAT-3'<br>5'-CGCCGAAAGAAGCCCTTAC-3'     |
| CPT-1 $\beta$  | Carnitine palmitoyl-transferase 1B               | 5'-CGAGGATTCTCTGGAAGTGC-3'<br>5'-GGTCGCTTCTTCAAGGTCTG-3'       |
| MCAD           | Medium chain acyl-CoA dehydrogenase              | 5'-CAACACTCGAAAGCGGCTCA-3'<br>5'-ACTTGCGGGCAGTTGCTTG-3'        |
| LCAD           | Long chain acyl-CoA dehydrogenase                | 5'-GGCAAATACTGGGCATCTGA-3'<br>5'-CTCCGTGGAGTTGCACACAT-3'       |
| VLCAD          | Very long chain acyl-CoA dehydrogenase           | 5'-ACCTTGCCAGGGCCTGAT-3'<br>5'-TGGCCTGGTCACCGTAA-3'            |
| AOX            | Acyl CoA oxidase 1                               | 5'-AGATTGGTAGAAATTGCTGCAAAA-3'<br>5'-ACGCCACTTCCTTGCTCTTC-3'   |
| PDK4           | Pyruvate dehydrogenase kinase 4                  | 5'-ATCTAACATCGCCAGAATTAACC-3'<br>5'-GGAACGTACACAATGTGGATTG-3'  |
| F4/80          | F4/80                                            | 5'-GGATGTACAGATGGGGGATG<br>5'-CATAAGCTGGGCAAGTGGTA             |
| CD11c          | Integrin, alpha X                                | 5'-CAGTGACCCCGATCACTCTT<br>5'-CACCACCAGGGTCTTCAAGT             |
| IL-6           | Interleukin 6                                    | 5'-GAGGATACCACTCCCAACAGACC-3'<br>5'-CAGCTCCAACAGCCTTACTACGT -3 |
| TBP            | TATA binding protein                             | 5'-GAAGCTGCGGTACAATTCCAG-3'<br>5'-CCCCTTGTACCCTTCACCAAT-3'     |
| 36B4           | Ribosomal protein, large, P0 (Rplp0)             | 5'-AGCCATGTACGTAGCCATCCA -3'<br>5'-TCTCCGGAGTCCATCACAATG -3'   |
| MtCO1          | Mitochondrial DNA encoded cytochrome c oxidase 1 | 5'-TGCTAGCCGCAGGCATTAC-3'<br>5'-GGGTGCCCAAAGAATCAGAAC-3'       |
| Ndufv1         | Nuclear DNA encoded NADH dehydrogenase           | 5'-CTTCCCCACTGGCCTCAAG-3'<br>5'-CCAAAACCCAGTGATCCAGC-3'        |
